# Supplementary material for: FTIR metabolomic fingerprint reveals different modes of action exerted by active pharmaceutical ingredient based ionic liquids (API-ILs) on Salmonella typhimurium
Source: Royal Society of Chemistry journal article supplement (doi:10.1039/c5ra24970h), 2016-01-01
Supplement: c5ra24970h1.pdf [file c5ra24970h1.pdf]

Received 00th January 20xx,  
Accepted 00th January 20xx

DOI: 10.1039/x0xx00000x

[www.rsc.org/](http://www.rsc.org/)

## FTIR metabolomic fingerprint reveals different modes of action exerted by active pharmaceutical ingredient based Ionic Liquids (API-ILs) on *Salmonella* Typhimurium

P. Mester,<sup>a</sup> A. K. Jehle,<sup>a</sup> C. Leeb,<sup>a</sup> R. Kalb,<sup>b</sup> T. Grunert<sup>c,†</sup> and P. Rossmanith<sup>a,†</sup>

### Supplement

**Table S1** MICs of all 36 ILs against eight different *Salmonella* serovars.

---

<sup>a</sup> Christian Doppler Laboratory for Monitoring of Microbial Contaminants, Department of Veterinary Public Health and Food Science, University of Veterinary Medicine, Veterinaerplatz 1, 1210 Vienna (Austria).

<sup>b</sup> Proionic GmbH Parkring 18, 8074 Grambach (Austria).

<sup>c</sup> Functional Microbiology, Institute of Microbiology, Department of Pathobiology, University of Veterinary Medicine, Veterinaerplatz 1, 1210 Vienna (Austria).

† These authors have contributed equally to this work.

Electronic Supplementary Information (ESI) available: [details of any supplementary information available should be included here]. See DOI: 10.1039/x0xx00000x

| MIC ( $\mu\text{M}$ ) 24h                        |                  |                   |                     |                 |                    |                 |                 |                |                 |
|--------------------------------------------------|------------------|-------------------|---------------------|-----------------|--------------------|-----------------|-----------------|----------------|-----------------|
| S. Typhimurium                                   |                  |                   | $\Delta\text{invA}$ |                 | $\Delta\text{trc}$ |                 | S. Bongori      |                |                 |
| IL cation                                        | IL anion         |                   |                     |                 |                    |                 |                 |                |                 |
|                                                  | chloride         | nalidixate        | chloride            | nalidixate      | chloride           | nalidixate      | chloride        | nalidixate     | nalidixate      |
| [C <sub>1</sub> mim] <sup>+</sup>                | > 1000           | 79.3 $\pm$ 27.5   | > 1000              | > 1000          | > 1000             | > 1000          | > 1000          | > 1000         | 23.8 $\pm$ 0.0  |
| [C <sub>2</sub> mim] <sup>+</sup>                | > 1000           | 91.3 $\pm$ 0.0    | > 1000              | > 1000          | > 1000             | > 1000          | > 1000          | > 1000         | 60.8 $\pm$ 26.3 |
| [C <sub>3</sub> C <sub>4</sub> mim] <sup>+</sup> | > 1000           | 38.4 $\pm$ 9.5    | > 1000              | > 1000          | > 1000             | > 1000          | > 1000          | > 1000         | 21.9 $\pm$ 0.0  |
| [C <sub>4</sub> mim] <sup>+</sup>                | > 1000           | 98.4 $\pm$ 64.4   | > 1000              | > 1000          | > 1000             | > 1000          | > 1000          | > 1000         | 35.1 $\pm$ 12.2 |
| [C <sub>5</sub> mim] <sup>+</sup>                | > 1000           | 94.8 $\pm$ 62.1   | > 1000              | > 1000          | > 1000             | > 1000          | > 1000          | > 1000         | 20.3 $\pm$ 0.0  |
| [C <sub>6</sub> mim] <sup>+</sup>                | > 1000           | 161.8 $\pm$ 124.3 | > 1000              | > 1000          | > 1000             | > 1000          | > 1000          | > 1000         | 48.1 $\pm$ 35.6 |
| [TMC <sub>1</sub> A] <sup>+</sup>                | > 1000           | 50.5 $\pm$ 32.5   | > 1000              | > 1000          | > 1000             | > 1000          | > 1000          | > 1000         | 23.2 $\pm$ 4.8  |
| [TMC <sub>2</sub> A] <sup>+</sup>                | > 1000           | 87.7 $\pm$ 20.1   | > 1000              | > 1000          | > 1000             | > 1000          | > 1000          | > 1000         | 92.7 $\pm$ 61.1 |
| [TMC <sub>3</sub> A] <sup>+</sup>                | > 1000           | 50.0 $\pm$ 26.7   | > 1000              | > 1000          | > 1000             | > 1000          | > 1000          | > 1000         | 21.8 $\pm$ 3.4  |
| [TMC <sub>4</sub> A] <sup>+</sup>                | > 1000           | 72.4 $\pm$ 62.7   | > 1000              | 579.2           | > 1000             | 579.2           | > 1000          | > 1000         | 30.2 $\pm$ 10.5 |
| [TMC <sub>5</sub> A] <sup>+</sup>                | > 1000           | 74.4 $\pm$ 67.0   | > 1000              | > 1000          | > 1000             | > 1000          | > 1000          | > 1000         | 68.0 $\pm$ 88.3 |
| [TMC <sub>10</sub> A] <sup>+</sup>               | 109.9 $\pm$ 14.1 | 14.7 $\pm$ 3.9    | 140.4 $\pm$ 70.1    | 87.1 $\pm$ 43.5 | 94.6 $\pm$ 25.2    | 87.1 $\pm$ 43.5 | 42.7 $\pm$ 10.6 | 13.3 $\pm$ 3.3 | 13.3 $\pm$ 3.3  |
| [TC <sub>1</sub> MA] <sup>+</sup>                | > 1000           | 40.0 $\pm$ 30.7   | > 1000              | > 1000          | > 1000             | > 1000          | > 1000          | > 1000         | 15.8 $\pm$ 3.9  |
| [TC <sub>2</sub> MA] <sup>+</sup>                | 38.7 $\pm$ 0.0   | 34.7 $\pm$ 15.0   | 51.6 $\pm$ 22.3     | 52.1 $\pm$ 0.0  | 38.7 $\pm$ 0.0     | 52.1 $\pm$ 0.0  | 38.7 $\pm$ 0.0  | 26.0 $\pm$ 0.0 | 26.0 $\pm$ 0.0  |
| [Emmor] <sup>+</sup>                             | > 1000           | 104.5 $\pm$ 61.5  | > 1000              | > 1000          | > 1000             | > 1000          | > 1000          | > 1000         | 30.6 $\pm$ 11.3 |
| [Bmpyr] <sup>+</sup>                             | > 1000           | 50.7 $\pm$ 33.2   | > 1000              | > 1000          | > 1000             | > 1000          | > 1000          | > 1000         | 43.5 $\pm$ 37.6 |
| [Bmpyr] <sup>+</sup>                             | > 1000           | 177.5 $\pm$ 143.8 | > 1000              | > 1000          | > 1000             | > 1000          | > 1000          | > 1000         | 34.1 $\pm$ 11.8 |
| [TC <sub>1</sub> MP] <sup>+</sup>                | > 1000           | 87.1 $\pm$ 34.8   | > 1000              | > 1000          | > 1000             | > 1000          | > 1000          | > 1000         | 30.5 $\pm$ 8.7  |
| [TC <sub>2</sub> MP] <sup>+</sup>                | 37.1 $\pm$ 0.0   | 22.2 $\pm$ 5.5    | 37.1 $\pm$ 0.0      | 22.2 $\pm$ 5.5  | 37.1 $\pm$ 0.0     | 22.2 $\pm$ 5.5  | 37.1 $\pm$ 0.0  | 25.4 $\pm$ 0.0 | 25.4 $\pm$ 0.0  |
| Na <sup>+</sup>                                  | n. t.            | 38.9 $\pm$ 19.9   | n. t.               | > 1000          | n. t.              | > 1000          | n. t.           | 28.1 $\pm$ 9.7 | 28.1 $\pm$ 9.7  |

  

| MIC ( $\mu\text{M}$ ) 24h                        |                 |                 |                  |                   |                 |                 |                 |                  |                  |
|--------------------------------------------------|-----------------|-----------------|------------------|-------------------|-----------------|-----------------|-----------------|------------------|------------------|
| S. Arizonae                                      |                 | S. Indica       |                  | S. Houtenae       |                 | S. Salamae      |                 |                  |                  |
| IL cation                                        | IL anion        |                 |                  |                   |                 |                 |                 |                  |                  |
|                                                  | chloride        | nalidixate      | chloride         | nalidixate        | chloride        | nalidixate      | chloride        | nalidixate       | nalidixate       |
| [C <sub>1</sub> mim] <sup>+</sup>                | > 1000          | 23.8 $\pm$ 0.0  | > 1000           | 63.4 $\pm$ 27.5   | > 1000          | 47.6 $\pm$ 0.0  | > 1000          | 31.7 $\pm$ 13.7  | 31.7 $\pm$ 13.7  |
| [C <sub>2</sub> mim] <sup>+</sup>                | > 1000          | 45.6 $\pm$ 0.0  | > 1000           | 121.7 $\pm$ 52.7  | > 1000          | 45.6 $\pm$ 0.0  | > 1000          | 30.4 $\pm$ 13.2  | 30.4 $\pm$ 13.2  |
| [C <sub>3</sub> C <sub>4</sub> mim] <sup>+</sup> | > 1000          | 21.9 $\pm$ 0.0  | > 1000           | 96.8 $\pm$ 74.4   | > 1000          | 67.6 $\pm$ 34.8 | > 1000          | 21.9 $\pm$ 0.0   | 21.9 $\pm$ 0.0   |
| [C <sub>4</sub> mim] <sup>+</sup>                | > 1000          | 35.1 $\pm$ 12.2 | > 1000           | 112.5 $\pm$ 48.7  | > 1000          | 98.4 $\pm$ 64.4 | > 1000          | 42.2 $\pm$ 36.5  | 42.2 $\pm$ 36.5  |
| [C <sub>5</sub> mim] <sup>+</sup>                | > 1000          | 20.3 $\pm$ 0.0  | > 1000           | 81.3 $\pm$ 0.0    | > 1000          | 54.2 $\pm$ 23.5 | > 1000          | 33.9 $\pm$ 11.7  | 33.9 $\pm$ 11.7  |
| [C <sub>6</sub> mim] <sup>+</sup>                | > 1000          | 56.5 $\pm$ 29.1 | > 1000           | 225.9 $\pm$ 116.3 | > 1000          | 88.5 $\pm$ 52.1 | > 1000          | 44.3 $\pm$ 26.0  | 44.3 $\pm$ 26.0  |
| [TMC <sub>1</sub> A] <sup>+</sup>                | > 1000          | 26.4 $\pm$ 17.4 | > 1000           | 59.2 $\pm$ 30.2   | > 1000          | 42.4 $\pm$ 17.6 | > 1000          | 26.4 $\pm$ 17.4  | 26.4 $\pm$ 17.4  |
| [TMC <sub>2</sub> A] <sup>+</sup>                | > 1000          | 85.7 $\pm$ 68.0 | > 1000           | 140.5 $\pm$ 46.3  | > 1000          | 74.5 $\pm$ 30.9 | > 1000          | 48.5 $\pm$ 31.2  | 48.5 $\pm$ 31.2  |
| [TMC <sub>3</sub> A] <sup>+</sup>                | > 1000          | 31.5 $\pm$ 10.3 | > 1000           | 62.9 $\pm$ 20.5   | > 1000          | 62.9 $\pm$ 20.5 | > 1000          | 83.5 $\pm$ 101.0 | 83.5 $\pm$ 101.0 |
| [TMC <sub>4</sub> A] <sup>+</sup>                | > 1000          | 24.1 $\pm$ 10.5 | > 1000           | 72.4 $\pm$ 0.0    | > 1000          | 60.3 $\pm$ 20.9 | > 1000          | 30.2 $\pm$ 10.5  | 30.2 $\pm$ 10.5  |
| [TMC <sub>12</sub> A] <sup>+</sup>               | > 1000          | 68.0 $\pm$ 88.3 | > 1000           | 102.0 $\pm$ 58.9  | > 1000          | 79.3 $\pm$ 78.5 | > 1000          | 68.0 $\pm$ 88.3  | 68.0 $\pm$ 88.3  |
| [TMC <sub>10</sub> A] <sup>+</sup>               | 85.4 $\pm$ 21.1 | 13.3 $\pm$ 3.3  | 170.9 $\pm$ 42.3 | 26.5 $\pm$ 6.6    | 75.3 $\pm$ 38.8 | 13.3 $\pm$ 3.3  | 59.0 $\pm$ 34.7 | 13.3 $\pm$ 3.3   | 13.3 $\pm$ 3.3   |
| [TC <sub>1</sub> MA] <sup>+</sup>                | > 1000          | 15.8 $\pm$ 3.9  | > 1000           | 63.4 $\pm$ 15.7   | > 1000          | 55.8 $\pm$ 28.7 | > 1000          | 15.8 $\pm$ 3.9   | 15.8 $\pm$ 3.9   |
| [TC <sub>2</sub> MA] <sup>+</sup>                | 64.4 $\pm$ 22.3 | 26.0 $\pm$ 0.0  | 64.4 $\pm$ 22.3  | 26.0 $\pm$ 0.0    | 51.6 $\pm$ 22.3 | 26.0 $\pm$ 0.0  | 38.7 $\pm$ 0.0  | 34.7 $\pm$ 15.0  | 34.7 $\pm$ 15.0  |
| [Emmor] <sup>+</sup>                             | > 1000          | 37.8 $\pm$ 10.8 | > 1000           | 75.7 $\pm$ 18.7   | > 1000          | 75.7 $\pm$ 18.7 | > 1000          | 37.8 $\pm$ 22.9  | 37.8 $\pm$ 22.9  |
| [Bmpyr] <sup>+</sup>                             | > 1000          | 29.0 $\pm$ 12.5 | > 1000           | 72.4 $\pm$ 25.1   | > 1000          | 43.5 $\pm$ 0.0  | > 1000          | 18.1 $\pm$ 6.3   | 18.1 $\pm$ 6.3   |
| [Bmpyr] <sup>+</sup>                             | > 1000          | 27.3 $\pm$ 11.8 | > 1000           | 54.6 $\pm$ 23.6   | > 1000          | 54.6 $\pm$ 23.6 | > 1000          | 17.1 $\pm$ 5.9   | 17.1 $\pm$ 5.9   |
| [TC <sub>1</sub> MP] <sup>+</sup>                | > 1000          | 30.5 $\pm$ 8.7  | > 1000           | 121.9 $\pm$ 104.5 | > 1000          | 81.3 $\pm$ 53.2 | > 1000          | 21.8 $\pm$ 8.7   | 21.8 $\pm$ 8.7   |
| [TC <sub>2</sub> MP] <sup>+</sup>                | 49.5 $\pm$ 21.4 | 22.2 $\pm$ 5.5  | 37.1 $\pm$ 0.0   | 22.2 $\pm$ 5.5    | 30.9 $\pm$ 10.7 | 22.2 $\pm$ 5.5  | 27.8 $\pm$ 13.1 | 22.2 $\pm$ 5.5   | 22.2 $\pm$ 5.5   |
| Na <sup>+</sup>                                  | n. t.           | 22.4 $\pm$ 9.7  | n. t.            | 67.3 $\pm$ 0.0    | n. t.           | 56.1 $\pm$ 19.4 | n. t.           | 22.4 $\pm$ 9.7   | 22.4 $\pm$ 9.7   |

n.t. – not tested

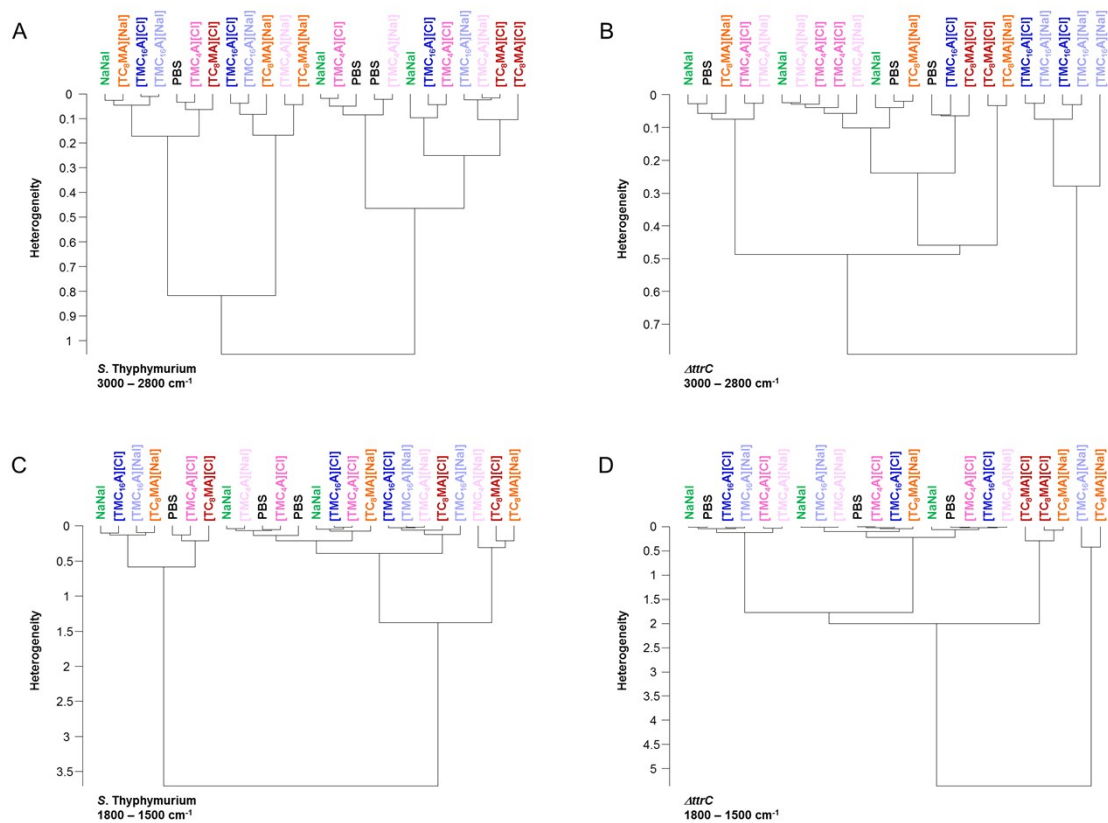

**Fig. S1** FTIR spectroscopy-based dendrograms of *S. Typhimurium* after long-term treatments. The dendrograms show no cluster formation caused by the long-term treatments with the ionic liquids based on [TC<sub>8</sub>MA], [TMC<sub>16</sub>A] and [TMC<sub>4</sub>A] and the controls, PBS and sodium nalidixate. No distinct effect is obvious in the region of fatty acids (A, B) or in the protein region (C, D), neither in *S. Typhimurium* (A, C) or the nalidixine insensitive mutant  $\Delta trrC$  (B, D).

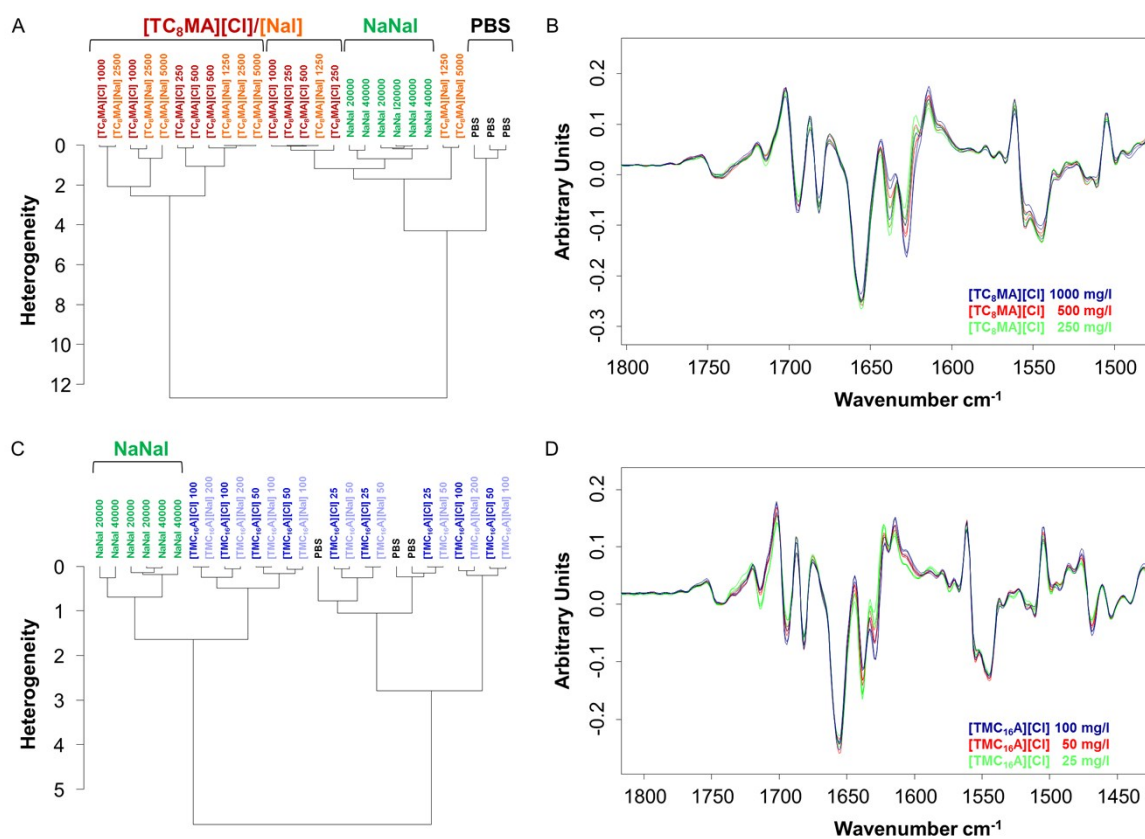

**Fig. S2** Clustering and concentration-dependent effects of [TC<sub>8</sub>MA][Cl] and [TMC<sub>16</sub>A][Cl] treatment on *S. Typhimurium* in the spectral region of proteins. (A, C) FTIR spectroscopy-based dendrogram of *S. Typhimurium* after short-term treatments with [TC<sub>8</sub>MA][Cl] / [NaI] (A) and [TMC<sub>16</sub>A][Cl] / NaI (C) with sodium nalidixate and PBS as controls show no cluster formation based on treatments with the ionic liquids. (B, D) FTIR spectra of *S. Typhimurium* treated with three different concentrations of [TC<sub>8</sub>MA][Cl] (B) and [TMC<sub>16</sub>A][Cl] (D) in the spectral range 1,800 to 1,500 cm<sup>-1</sup>, showing the concentration dependency of spectral changes.

**Table S2** Reduction of *S. Typhimurium* CFUs after 1 hour exposure to ILs.

|                                        |                     | Log reduction of <i>S. Typhimurium</i> CFU after 1h exposure to ILs |          |                    |          |                    |           |             |
|----------------------------------------|---------------------|---------------------------------------------------------------------|----------|--------------------|----------|--------------------|-----------|-------------|
|                                        |                     | 10000 mg/L                                                          |          | 20000 mg/L         |          | 40000 mg/L         |           |             |
| <b>[TMC<sub>4</sub>A]<sup>+</sup></b>  | NaI                 | n.t.                                                                |          | -0.66              | ±0.25    | <b>-3.97</b>       | ±1.72     |             |
|                                        | nalidixate chloride | -1.21                                                               | ±0.39    | -0.30              | ±0.24    | -0.66              | ±0.08     |             |
|                                        |                     | 0.00                                                                | ±0.04    | -0.04              | ±0.06    | -0.07              | ±0.08     |             |
| <b>[TMC<sub>16</sub>A]<sup>+</sup></b> |                     |                                                                     | 25 mg/L  |                    | 50 mg/L  |                    | 100 mg/L  |             |
|                                        | nalidixate chloride | n.t.                                                                |          | -0.23              | ±0.04    | -0.94              | ±0.11     | -2.55 ±1.08 |
|                                        |                     | -0.14                                                               | ±0.02    | -0.87              | ±0.32    | -2.42              | ±1.62     | n.t.        |
| <b>[TC<sub>8</sub>MA]<sup>+</sup></b>  |                     |                                                                     | 250 mg/L |                    | 500 mg/L |                    | 1000 mg/L |             |
|                                        | chloride            | -1.87 ±0.75                                                         |          | <b>-4.04</b> ±1.61 |          | <b>-6.94</b> ±3.86 |           |             |
|                                        |                     |                                                                     |          | 1250 mg/L          |          | 2500 mg/L          |           | 5000 mg/L   |
| <b>[TC<sub>8</sub>MA]<sup>+</sup></b>  | nalidixate          | <b>-4.17</b> ±5.26                                                  |          | <b>-8.52</b> ±2.96 |          | <b>-6.81</b> ±4.41 |           |             |

n.t. – not tested

Bold numbers indicate a > 3 log CFU reduction (99.9%)
